# Supplementary material for: Development and validation of prediction models for gestational diabetes treatment modality using supervised machine learning: a population-based cohort study
Source: Springer Nature journal article supplement (doi:10.1186/s12916-022-02499-7), 2022-09-15

**Additional Figure 1. Flow chart of the sequential treatment regime for gestational diabetes**

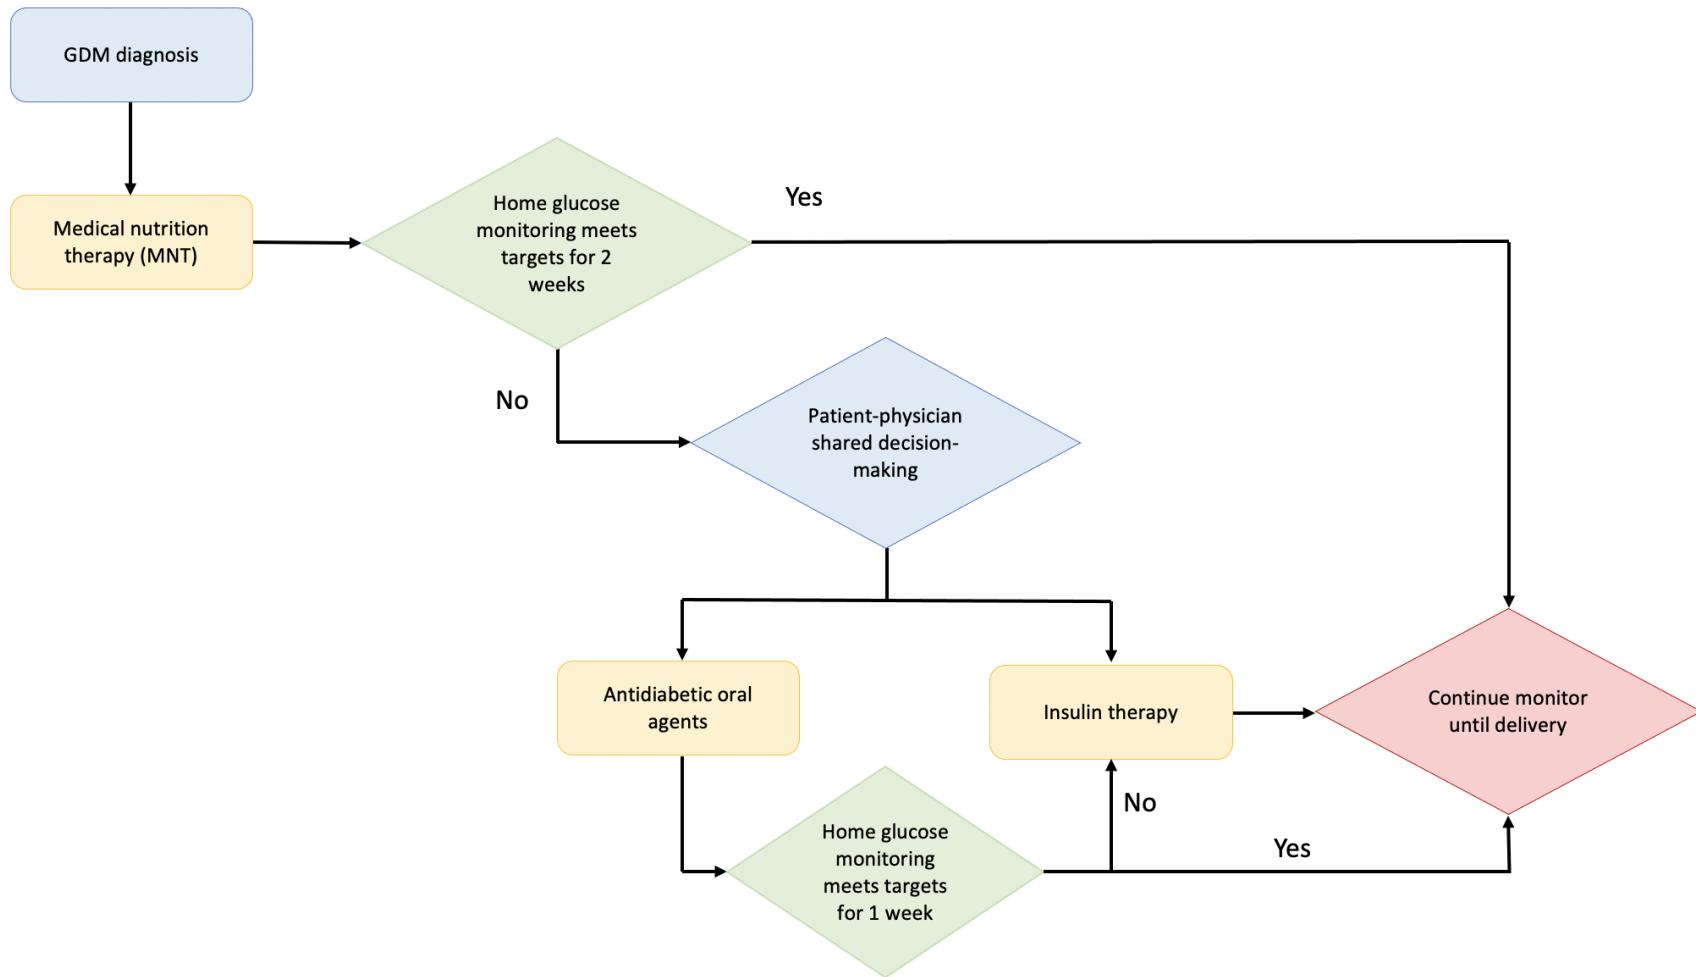

Supplement: MOESM1 [file 23497772]
