# Supplementary material for: Development and validation of prediction models for gestational diabetes treatment modality using supervised machine learning: a population-based cohort study
Source: Springer Nature journal article supplement (doi:10.1186/s12916-022-02499-7), 2022-09-15
Supplement: MOESM2 [file 23497772]

**Additional Table 1: Detailed list of potential predictors extracted from electronic health records**

| Timing                                          | Type                                                                  | Predictors                                                                 | Missing Rate, %                                                               |      |
|-------------------------------------------------|-----------------------------------------------------------------------|----------------------------------------------------------------------------|-------------------------------------------------------------------------------|------|
| 1. One year prior to the index pregnancy to LMP | Birth information                                                     | Year pregnancy initiated                                                   | 0.0%                                                                          |      |
|                                                 |                                                                       | Birth counts recorded as singleton, twin, or multiples                     | 0.0%                                                                          |      |
|                                                 | Demographics                                                          | Age of mother at delivery                                                  | 0.0%                                                                          |      |
|                                                 |                                                                       | Race/ethnicity                                                             | 0.0%                                                                          |      |
|                                                 |                                                                       | Race/ethnicity defined by Kaiser Permanente Northern California categories | 0.0%                                                                          |      |
|                                                 |                                                                       | Hispanic or Latino ethnicity                                               | 0.0%                                                                          |      |
|                                                 |                                                                       | Highest education obtained by the mother                                   | 8.2%                                                                          |      |
|                                                 |                                                                       | ≥6 months gap in Kaiser Permanente membership                              | 0.0%                                                                          |      |
|                                                 |                                                                       | Median family income numeric                                               | 0.7%                                                                          |      |
|                                                 |                                                                       | Median family income categorical                                           | 0.7%                                                                          |      |
|                                                 |                                                                       | Median household income numeric                                            | 0.7%                                                                          |      |
|                                                 |                                                                       | Median household income categorical                                        | 0.7%                                                                          |      |
|                                                 |                                                                       | Parity excluding current pregnancy                                         | 0.0%                                                                          |      |
|                                                 |                                                                       | Lifestyle/behavioral factors 12 months before pregnancy                    | Nicotine (i.e. cigarettes, nicorette gum) recorded as daily, weekly, or never | 0.0% |
|                                                 |                                                                       |                                                                            | Nicotine (i.e. cigarettes, nicorette gum) recorded as ever or never           | 0.0% |
|                                                 | Alcohol (i.e. wine, beer, liquor) recorded as daily, weekly, or never |                                                                            | 0.0%                                                                          |      |
|                                                 | Alcohol (i.e. wine, beer, liquor) recorded as ever or never           |                                                                            | 0.0%                                                                          |      |
|                                                 | Exercise days per week prior to conception                            |                                                                            | 62.8%                                                                         |      |
|                                                 | Exercise days per week prior to conception in three categories        |                                                                            | 62.8%                                                                         |      |
|                                                 | Exercise minutes per day prior to conception                          |                                                                            | 62.9%                                                                         |      |
|                                                 | Exercise minutes per days prior to conception in four categories      |                                                                            | 62.9%                                                                         |      |
|                                                 | Exercise minutes per week prior to conception                         |                                                                            | 62.9%                                                                         |      |
|                                                 | Exercise minutes per week prior to conception in three categories     |                                                                            | 62.9%                                                                         |      |
|                                                 |                                                                       | Anemia by diagnosis                                                        | 0.0%                                                                          |      |

|                                        |                                                                      |        |      |
|----------------------------------------|----------------------------------------------------------------------|--------|------|
|                                        | Use of antihyperlipidemic medication                                 | 0.0%   |      |
|                                        | Use of antihypertensive medications <sup>1</sup>                     | 0.0%   |      |
|                                        | Arrhythmia by diagnosis                                              | 0.0%   |      |
|                                        | Asthma by diagnosis                                                  | 0.0%   |      |
|                                        | Malignant cancer prior to GDM                                        | 0.0%   |      |
|                                        | Benign/borderline/in situ cancer prior to GDM                        | 0.0%   |      |
|                                        | Cerebrovascular disease by diagnosis                                 | 0.0%   |      |
|                                        | Cerebrovascular disease by procedure                                 | 0.0%   |      |
|                                        | Cerebrovascular disease by diagnosis or procedure                    | 0.0%   |      |
|                                        | Coronary heart disease by diagnosis                                  | 0.0%   |      |
|                                        | Coronary heart disease by procedure                                  | 0.0%   |      |
|                                        | Coronary heart disease by diagnosis or procedure                     | 0.0%   |      |
|                                        | Chronic heart failure by diagnosis                                   | 0.0%   |      |
|                                        | Pre-existing depression                                              | 0.0%   |      |
|                                        | Dyslipidemia by diagnosis                                            | 0.0%   |      |
|                                        | Dyslipidemia by diagnosis or medications                             | 0.0%   |      |
| Pre-existing conditions/family history | Family history of diabetes by diagnosis                              | 0.0%   |      |
|                                        | Hypertension diagnosed <sup>1</sup>                                  | 0.0%   |      |
|                                        | History of abortive outcome (ICD9:630-639, ICD10:O00-O08)            | 0.0%   |      |
|                                        | Previous macrosomia (>4.5kg)                                         | 0.0%   |      |
|                                        | History of gestational diabetes                                      | 0.0%   |      |
|                                        | Chronic kidney disease by diagnosis                                  | 0.0%   |      |
|                                        | Polycystic ovary syndrome by diagnosis                               | 0.0%   |      |
|                                        | Peripheral vascular diseases by diagnosis                            | 0.0%   |      |
|                                        | Peripheral vascular diseases by procedure                            | 0.0%   |      |
|                                        | Peripheral vascular diseases by diagnosis or procedure               | 0.0%   |      |
|                                        | Fasting plasma glucose value 100-125 mg/dL                           | 0.0%   |      |
|                                        | 2-hour post challenge plasma glucose value 140-199 mg/dL             | 0.0%   |      |
|                                        | HbA1C value 5.7-6.5%                                                 | 0.0%   |      |
|                                        | Chronic obstructive pulmonary disease by diagnosis                   | 0.0%   |      |
|                                        | Pre-existing prediabetes <sup>1</sup> diagnosis by lab and ICD codes | 0.0%   |      |
|                                        | Typical measures                                                     | Height | 0.2% |

|  |                                                                               |       |
|--|-------------------------------------------------------------------------------|-------|
|  | Weight                                                                        | 7.2%  |
|  | Pre-pregnancy body mass index                                                 | 7.3%  |
|  | Highest triglyceride preconception $\geq 200$ mg/dl                           | 0.0%  |
|  | Highest triglyceride during pregnancy $\geq 200$ mg/dl                        | 0.0%  |
|  | Highest Cholesterol preconception $\geq 240$ mg/dl                            | 0.0%  |
|  | Highest Cholesterol pregnancy $\geq 240$ mg/dl                                | 0.0%  |
|  | Lowest HDL preconception $< 40$ mg/dl                                         | 0.0%  |
|  | Lowest HDL during pregnancy $< 40$ mg/dl                                      | 0.0%  |
|  | Highest LDL preconception $\geq 160$ mg/dl                                    | 0.0%  |
|  | Highest LDL during pregnancy $\geq 160$ mg/dl                                 | 0.0%  |
|  | Average diastolic blood pressure <sup>1</sup>                                 | 28.4% |
|  | Average systolic blood pressure <sup>1</sup>                                  | 28.4% |
|  | <b>Baby information</b>                                                       |       |
|  | Sex of the baby                                                               | 1.2%  |
|  | Nicotine (i.e. cigarettes, Nicorette gum) recorded as daily, weekly, or never | 0.0%  |
|  | Nicotine (i.e. cigarettes, Nicorette gum) recorded as ever or never           | 0.0%  |
|  | Alcohol (i.e. wine, beer, liquor) recorded as daily, weekly, or never         | 0.0%  |
|  | Alcohol (i.e. wine, beer, liquor) recorded as ever or never                   | 0.0%  |
|  | Exercise days per week during pregnancy prior to GDM                          | 46.0% |
|  | Exercise days per week during pregnancy prior to GDM in three categories      | 46.0% |
|  | Exercise minutes per day during pregnancy prior to GDM                        | 46.1% |
|  | Exercise minutes per days during pregnancy prior to GDM in four categories    | 46.1% |
|  | Exercise minutes per week during pregnancy prior to GDM                       | 0.0%  |
|  | <b>Typical clinical measures/medications</b>                                  |       |
|  | Last pregnancy weight prior to GDM                                            | 3.5%  |
|  | Difference in days between last weight measured and GDM diagnosis             | 3.5%  |
|  | Depression diagnosis during pregnancy                                         | 0.0%  |
|  | Use of antihypertensive medications                                           | 0.0%  |

2. LMP to before GDM diagnosis

Lifestyle/Habits during pregnancy

|                     |                     |                                                                                                                         |       |
|---------------------|---------------------|-------------------------------------------------------------------------------------------------------------------------|-------|
|                     |                     | Average diastolic blood pressure in pregnancy                                                                           | 0.0%  |
|                     |                     | Average systolic blood pressure in pregnancy                                                                            | 0.0%  |
|                     |                     | Max diastolic blood pressure in pregnancy                                                                               | 0.0%  |
|                     |                     | Max systolic blood pressure in pregnancy                                                                                | 0.0%  |
|                     |                     | Median diastolic blood pressure in pregnancy                                                                            | 0.0%  |
|                     |                     | Median systolic blood pressure in pregnancy                                                                             | 0.0%  |
|                     |                     | Count of blood pressure in pregnancy                                                                                    | 0.0%  |
|                     |                     | Systolic blood pressure close to GDM diagnosis                                                                          | 3.0%  |
|                     |                     | Diastolic blood pressure close to GDM diagnosis                                                                         | 3.0%  |
|                     |                     | Gestational weight gain up to GDM date                                                                                  | 7.7%  |
|                     |                     | Screening value of glucose test not used for diagnosis                                                                  | 3.3%  |
|                     |                     | Hypertension diagnosis                                                                                                  | 0.0%  |
|                     |                     | Week of GDM Diagnosis                                                                                                   | 0.0%  |
|                     |                     | Fasting glucose value from the 3-hr OGTT                                                                                | 10.9% |
|                     |                     | Fasting glucose value from the 3-hr OGTT, <95 mg/dL                                                                     | 10.9% |
|                     |                     | One-hour glucose value from the 3-hr OGTT                                                                               | 10.8% |
|                     |                     | One-hour glucose value from the 3-hr OGTT, <180 mg/dL                                                                   | 10.8% |
|                     |                     | Two-hour glucose value from the 3-hr OGTT                                                                               | 10.8% |
|                     |                     | Two-hour glucose value from the 3-hr OGTT, <155 mg/dL                                                                   | 10.8% |
|                     |                     | Three-hour glucose value from the 3-hr OGTT                                                                             | 10.7% |
|                     |                     | Three-hour glucose value from the 3-hr OGTT, <140 mg/dL                                                                 | 10.7% |
|                     |                     | Abnormal value by the Carpenter and Coustan criteria <sup>2</sup>                                                       | 0.0%  |
|                     |                     | Gestational weeks at GDM diagnosis (continuous)                                                                         | 0.0%  |
|                     |                     | Measure of severity gathered from the 3-hr OGTT with at least 2 values from the fasting, 1-hour, 2-hour, 3-hour glucose | 0.0%  |
| 3. At GDM diagnosis | GDM diagnostic test |                                                                                                                         |       |

levels above 1 standard deviation of the respective mean

|                                                                        |                             |                                                                                                                      |      |
|------------------------------------------------------------------------|-----------------------------|----------------------------------------------------------------------------------------------------------------------|------|
| 4. One week following GDM diagnosis                                    | Glycemic control monitoring | Mean glucose test 1-hour after meal (breakfast, lunch, or dinner)                                                    | 7.9% |
|                                                                        |                             | Mean glucose test 1-hour after breakfast                                                                             | 8.2% |
|                                                                        |                             | Mean glucose test 1-hour after lunch                                                                                 | 8.3% |
|                                                                        |                             | Mean glucose test 1-hour after dinner                                                                                | 8.4% |
|                                                                        |                             | Mean fasting glucose                                                                                                 | 7.9% |
|                                                                        |                             | Met the goal of $\geq 80\%$ of glucose tests below 140 mg/dL 1-hour after meal                                       | 7.9% |
|                                                                        |                             | Met the goal of $\geq 80\%$ of glucose tests below 140 mg/dL 1-hour after breakfast                                  | 0.0% |
|                                                                        |                             | Met the goal of $\geq 80\%$ of glucose tests below 140 mg/dL 1-hour after lunch                                      | 0.0% |
|                                                                        |                             | Met the goal of $\geq 80\%$ of glucose tests below 140 mg/dL 1-hour after dinner                                     | 0.0% |
|                                                                        |                             | $\geq 80\%$ fasting glucose below or at 95 and $\geq 80\%$ of 1-hour postprandial glucose test below or at 140 mg/dL | 0.0% |
|                                                                        |                             | Met the goal of $\geq 80\%$ of all fasting and 1-hour postprandial glucose tests below cutoff point                  | 0.0% |
|                                                                        |                             | Met the goal of $\geq 80\%$ of glucose tests below 95 mg/dL                                                          | 0.0% |
|                                                                        |                             | Count of glucose test 1-hr after meal (breakfast, lunch, or dinner)                                                  | 7.9% |
|                                                                        |                             | Count of glucose test 1-hr after breakfast                                                                           | 8.2% |
|                                                                        |                             | Count of glucose test 1-hr after lunch                                                                               | 8.3% |
|                                                                        |                             | Count of glucose test 1-hr after dinner                                                                              | 8.4% |
|                                                                        |                             | Count of glucose test 1-hour after meal <140 mg/dL                                                                   | 7.9% |
|                                                                        |                             | Count of glucose test 1-hour after breakfast <140 mg/dL                                                              | 8.2% |
|                                                                        |                             | Count of glucose test 1-hour after lunch <140 mg/dL                                                                  | 8.3% |
|                                                                        |                             | Count of glucose test 1-hour after dinner <140 mg/dL                                                                 | 8.4% |
| Count of fasting glucose <95 mg/dL                                     | 7.9%                        |                                                                                                                      |      |
| Count of fasting glucose                                               | 7.9%                        |                                                                                                                      |      |
| % all fasting and 1-hr postprandial glucose less than the cutoff point | 7.8%                        |                                                                                                                      |      |

|                                                                                      |       |
|--------------------------------------------------------------------------------------|-------|
| % all fasting and 1-hr/2-hr postprandial glucose less than the cutoff point          | 7.8%  |
| % glucose test 1-hour after meal <140 mg/dL                                          | 7.9%  |
| % glucose test 1-hour after breakfast <140 mg/dL                                     | 8.2%  |
| % glucose test 1-hour after lunch <140 mg/dL                                         | 8.4%  |
| % glucose test 1-hour after dinner <140 mg/dL                                        | 8.3%  |
| % fasting glucose <95 mg/dL                                                          | 7.9%  |
| Met the goal of $\geq 80\%$ of glucose tests below 140 mg/dL 1-hour                  | 7.9%  |
| Met the goal of $\geq 80\%$ of glucose tests below 140 mg/dL 1-hour breakfast        | 0.0%  |
| Met the goal of $\geq 80\%$ of glucose tests below 140 mg/dL 1-hour lunch            | 0.0%  |
| Met the goal of $\geq 80\%$ of glucose tests below 140 mg/dL 1-hour dinner           | 0.0%  |
| Met 1-hour post lunch glycemic control $\geq 80\%$ during 1st week of initiation     | 15.6% |
| Met 1-hour post dinner glycemic control $\geq 80\%$ during 1st week of initiation    | 15.6% |
| Met 1-hour post breakfast glycemic control $\geq 80\%$ during 1st week of initiation | 15.6% |
| Met glycemic control $\geq 80\%$ during 1st week of initiation                       | 15.6% |
| Met fasting glycemic control $\geq 80\%$ during first week of initiation             | 15.6% |
| Mean glucose test 1-hour after breakfast during 1st week of initiation               | 17.0% |
| Mean glucose test 1-hour after lunch during 1st week of initiation                   | 17.1% |
| Mean glucose test 1-hour after dinner during 1st week of initiation                  | 17.2% |
| Mean fasting glucose during 1st week of initiation                                   | 16.4% |
| Count of 1-hour post lunch glycemic control measured during 1st week of initiation   | 17.1% |
| Count of 1-hour post dinner glycemic control measured during 1st week of initiation  | 17.2% |

---

|                                                                                                                         |       |
|-------------------------------------------------------------------------------------------------------------------------|-------|
| Count of 1-hour post breakfast glycemic control measured during 1st week of initiation                                  | 17.0% |
| Count of fasting glucose test measured during 1st week of initiation                                                    | 16.4% |
| Count of fasting, 1hr/2hr postprandial glucose tests measured during 1st week of initiation                             | 15.6% |
| Count of tests that met the goal for 1-hour post lunch glycemic control measured during 1st week of initiation          | 17.2% |
| Count of tests that met the goal for 1-hour post dinner glycemic control measured during 1st week of initiation         | 17.1% |
| Count of tests that met the goal for 1-hour post breakfast glycemic control measured during 1st week of initiation      | 17.0% |
| Count of tests that met the goal for fasting glucose test measured during 1st week of initiation                        | 16.4% |
| Count of tests that met the goal for fasting, 1hr/2hr postprandial glucose tests measured during 1st week of initiation | 15.6% |
| Count of tests that met the goal for fasting glucose test measured during 1st week of initiation                        | 16.4% |
| Count of tests that met the goal for fasting, 1hr/2hr postprandial glucose tests measured during 1st week of initiation | 15.6% |
| Count of tests that met the goal for fasting glucose test measured during 1st week of initiation                        | 16.4% |
| Count of tests that met the goal for fasting, 1hr/2hr postprandial glucose tests measured during 1st week of initiation | 15.6% |
| Count of tests that met the goal for fasting glucose test measured during 1st week of initiation                        | 16.4% |
| Count of tests that met the goal for fasting, 1hr/2hr postprandial glucose tests measured during 1st week of initiation | 15.6% |

---

|                                                                                                                                  |       |
|----------------------------------------------------------------------------------------------------------------------------------|-------|
| Count of tests that met the goal for<br>fasting glucose test measured during 1st<br>week of initiation                           | 16.4% |
| Count of tests that met the goal for<br>fasting, 1hr/2hr postprandial glucose<br>tests measured during 1st week of<br>initiation | 15.6% |

---
