# Supplementary material for: Development and validation of prediction models for gestational diabetes treatment modality using supervised machine learning: a population-based cohort study
Source: Springer Nature journal article supplement (doi:10.1186/s12916-022-02499-7), 2022-09-15
Supplement: MOESM3 [file 23497772]

**Additional Table 2. Out of bag imputation error estimates**

---

| Year | NRMSE  | PFC    |
|------|--------|--------|
| 2007 | 0.0012 | 0.0239 |
| 2008 | 0      | 0.0249 |
| 2009 | 0.0013 | 0.0254 |
| 2010 | 0.0013 | 0.0255 |
| 2011 | 0.0013 | 0.0247 |
| 2012 | 0.0013 | 0.0255 |
| 2013 | 0      | 0.0259 |
| 2014 | 0.0013 | 0.0256 |
| 2015 | 0.0013 | 0.0267 |
| 2016 | 0.0013 | 0.0253 |
| 2017 | 0.0013 | 0.0256 |

---

NRMSE, normalized root mean squared error; PFC, proportion of falsely classified entries
