# Supplementary material for: Development and validation of prediction models for gestational diabetes treatment modality using supervised machine learning: a population-based cohort study
Source: Springer Nature journal article supplement (doi:10.1186/s12916-022-02499-7), 2022-09-15
Supplement: MOESM4 [file 23497772]

**Additional Table 3: Treatment modality for gestational diabetes by calendar year**

|                             | All             | 2007           | 2008           | 2009           | 2010           | 2011           | 2012           | 2013           | 2014           | 2015           | 2016           | 2017           | <i>P</i> value <sup>1</sup> |
|-----------------------------|-----------------|----------------|----------------|----------------|----------------|----------------|----------------|----------------|----------------|----------------|----------------|----------------|-----------------------------|
|                             | <i>n</i> =      | <i>n</i> =     | <i>n</i> =     | <i>n</i> =     | <i>n</i> =     | <i>n</i> =     | <i>n</i> =     | <i>n</i> =     | <i>n</i> =     | <i>n</i> =     | <i>n</i> =     | <i>n</i> =     |                             |
|                             | 30,474          | 2598           | 2566           | 2846           | 2571           | 2491           | 2616           | 2548           | 2911           | 3152           | 2941           | 3234           |                             |
| MNT                         | 18657<br>(61.2) | 1968<br>(75.8) | 1941<br>(75.6) | 2008<br>(70.6) | 1609<br>(62.6) | 1695<br>(68.0) | 1740<br>(66.5) | 1387<br>(54.4) | 1832<br>(62.9) | 1582<br>(50.2) | 1189<br>(40.4) | 1706<br>(52.8) | 0.9995                      |
| Antidiabetic<br>oral agents | 9942<br>(32.6)  | 469<br>(18.1)  | 500<br>(19.5)  | 705<br>(24.8)  | 819<br>(31.9)  | 645<br>(25.9)  | 739<br>(28.2)  | 985<br>(38.7)  | 938<br>(32.2)  | 1394<br>(44.2) | 1469<br>(49.9) | 1279<br>(39.5) | 0.0003                      |
| Insulin therapy             | 1875<br>(6.2)   | 161<br>(6.2)   | 125<br>(4.9)   | 133<br>(4.7)   | 143<br>(5.6)   | 151<br>(6.1)   | 137<br>(5.2)   | 176<br>(6.9)   | 141<br>(4.8)   | 176<br>(5.6)   | 283<br>(9.6)   | 249<br>(7.7)   | 0.0801                      |

<sup>1</sup>Obtained by Mann-Kendall test; the alternative hypothesis states there exists a monotonically increasing trend.
