# Supplementary material for: Development and validation of prediction models for gestational diabetes treatment modality using supervised machine learning: a population-based cohort study
Source: Springer Nature journal article supplement (doi:10.1186/s12916-022-02499-7), 2022-09-15
Supplement: MOESM5 [file 23497772]

**Additional Table 4: 10-fold cross-validated AUC comparisons via Delong's test on the validation set**

| Prediction Method                  | Predictor Levels <sup>1</sup> | P-values  |
|------------------------------------|-------------------------------|-----------|
| CART                               | 1-2 vs. 1                     | 0.0127    |
|                                    | 1-3 vs. 1-2                   | <2.2e-16  |
|                                    | 1-4 vs. 1-3                   | 8.495E-08 |
| LASSO regression                   | 1-2 vs. 1                     | 0.0041    |
|                                    | 1-3 vs. 1-2                   | <2.2e-16  |
|                                    | 1-4 vs. 1-3                   | <2.2e-16  |
| Simple super learner <sup>2</sup>  | 1-2 vs. 1                     | 0.0103    |
|                                    | 1-3 vs. 1-2                   | <2.2e-16  |
|                                    | 1-4 vs. 1-3                   | <2.2e-16  |
| Complex super learner <sup>3</sup> | 1-2 vs. 1                     | 0.0008    |
|                                    | 1-3 vs. 1-2                   | <2.2e-16  |
|                                    | 1-4 vs. 1-3                   | <2.2e-16  |

AUC, area under the curve; CART, classification and regression tree; LASSO, least absolute shrinkage and selection operator; XGBoost, extreme gradient boosting

<sup>1</sup>Level 1: one-year preconception to last menstrual period; level 2: last menstrual period to before diagnosis of gestational diabetes; level 3: at the time of diagnosis of gestational diabetes; level 4: one week following diagnosis of gestational diabetes.

<sup>2</sup>Candidate algorithms in simple super learner included response-mean, LASSO regression, and CART.

<sup>3</sup>Candidate algorithms in complex super learner included response-mean, LASSO regression, CART, random forest, and XGBoost algorithms.
