# Supplementary material for: Development and validation of prediction models for gestational diabetes treatment modality using supervised machine learning: a population-based cohort study
Source: Springer Nature journal article supplement (doi:10.1186/s12916-022-02499-7), 2022-09-15
Supplement: MOESM6 [file 23497772]

**Additional Table 5: Complex super learner output**

| <b>Predictors level</b> | <b>Candidate algorithms</b> | <b>Risk<sup>1</sup></b> | <b>Coefficient</b> |
|-------------------------|-----------------------------|-------------------------|--------------------|
| Level 1                 | Response-mean               | 0.501                   | 0.027              |
|                         | LASSO regression            | 0.331                   | 0.301              |
|                         | CART                        | 0.393                   | 0                  |
|                         | Random forest               | 0.351                   | 0                  |
|                         | XGBoost                     | N/A <sup>2</sup>        | 0.673              |
| Levels 1-2              | Response-mean               | 0.501                   | 0.033              |
|                         | LASSO regression            | 0.316                   | 0.379              |
|                         | CART                        | 0.387                   | 0                  |
|                         | Random forest               | 0.330                   | 0.050              |
|                         | XGBoost                     | N/A <sup>2</sup>        | 0.539              |
| Levels 1-3              | Response-mean               | 0.501                   | 0.027              |
|                         | LASSO regression            | 0.214                   | 0.223              |
|                         | CART                        | 0.264                   | 0                  |
|                         | Random forest               | 0.215                   | 0.080              |
|                         | XGBoost                     | N/A <sup>2</sup>        | 0.670              |
| Levels 1-4              | Response-mean               | 0.501                   | 0.035              |
|                         | LASSO regression            | 0.151                   | 0.190              |
|                         | CART                        | 0.219                   | 0                  |
|                         | Random forest               | 0.146                   | 0.164              |
|                         | XGBoost                     | N/A <sup>2</sup>        | 0.611              |

CART, classification and regression trees; LASSO, least absolute shrinkage and selection operator; XGBoost, extreme gradient boosting

<sup>1</sup>Risk is the mean of the loss measured by the negative binomial log-likelihood

<sup>2</sup>N/A for XGBoost due to multiple tuning parameters used in the candidate learners set. Risk over multiple XGBoost algorithms is not shown.
