# Supplementary material for: Development and validation of prediction models for gestational diabetes treatment modality using supervised machine learning: a population-based cohort study
Source: Springer Nature journal article supplement (doi:10.1186/s12916-022-02499-7), 2022-09-15
Supplement: MOESM7 [file 23497772]

**Additional Table 6: Simple super learner output**

---

| Candidate algorithms | Risk <sup>1</sup> | Coefficient |
|----------------------|-------------------|-------------|
| Response-mean        | 0.501             | 0.372       |
| LASSO regression     | 0.331             | 0.628       |
| CART                 | 0.393             | 0           |
| Response-mean        | 0.501             | 0.344       |
| LASSO regression     | 0.316             | 0.648       |
| CART                 | 0.387             | 0.008       |
| Response-mean        | 0.501             | 0.375       |
| LASSO regression     | 0.214             | 0.537       |
| CART                 | 0.264             | 0.088       |
| Response-mean        | 0.501             | 0.334       |
| LASSO regression     | 0.151             | 0.588       |
| CART                 | 0.219             | 0.077       |

---

CART, classification and regression trees; LASSO, least absolute shrinkage and selection operator.

<sup>1</sup>Risk is the mean of the loss measured by the negative binomial log-likelihood
