# Supplementary material for: Development and validation of prediction models for gestational diabetes treatment modality using supervised machine learning: a population-based cohort study
Source: Springer Nature journal article supplement (doi:10.1186/s12916-022-02499-7), 2022-09-15

**A****CART**  
using predictors at level 1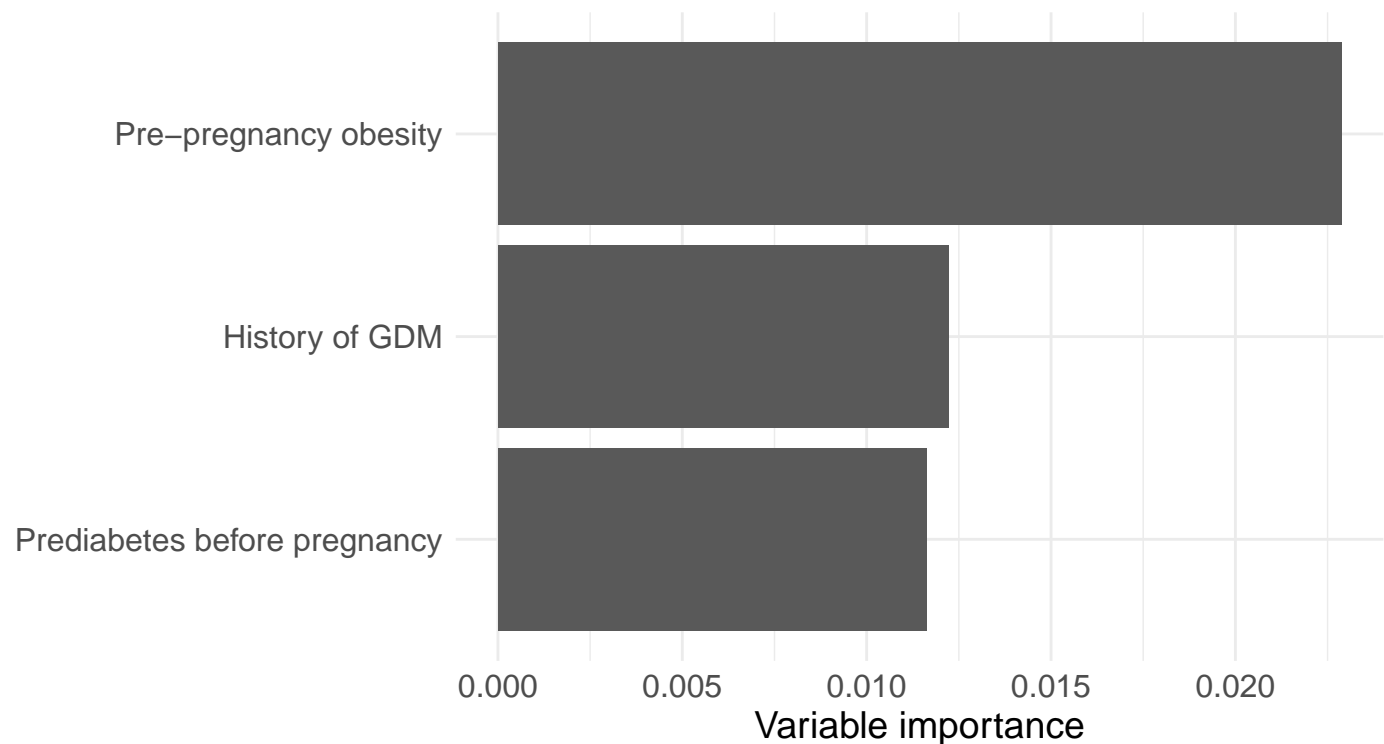**Simple super learner**  
using predictors at level 1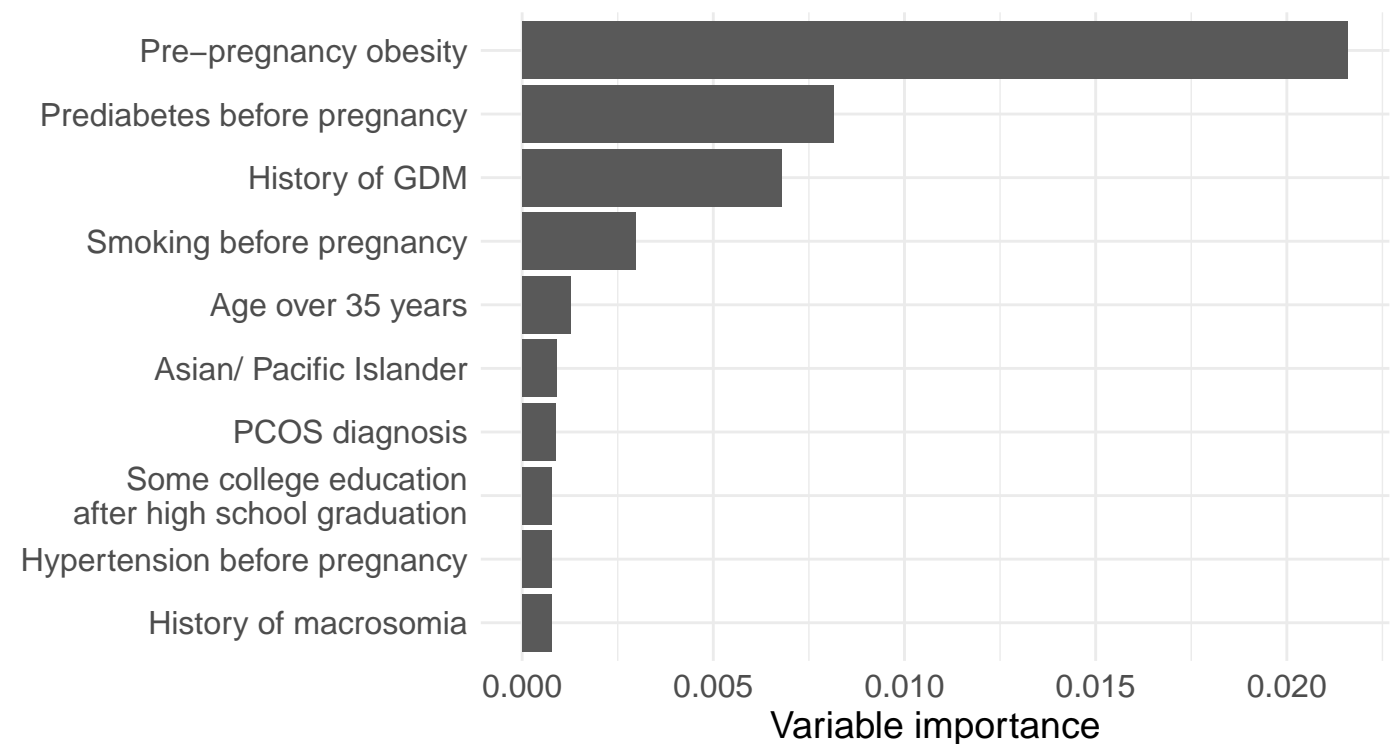**B****CART**  
using predictors at levels 1–2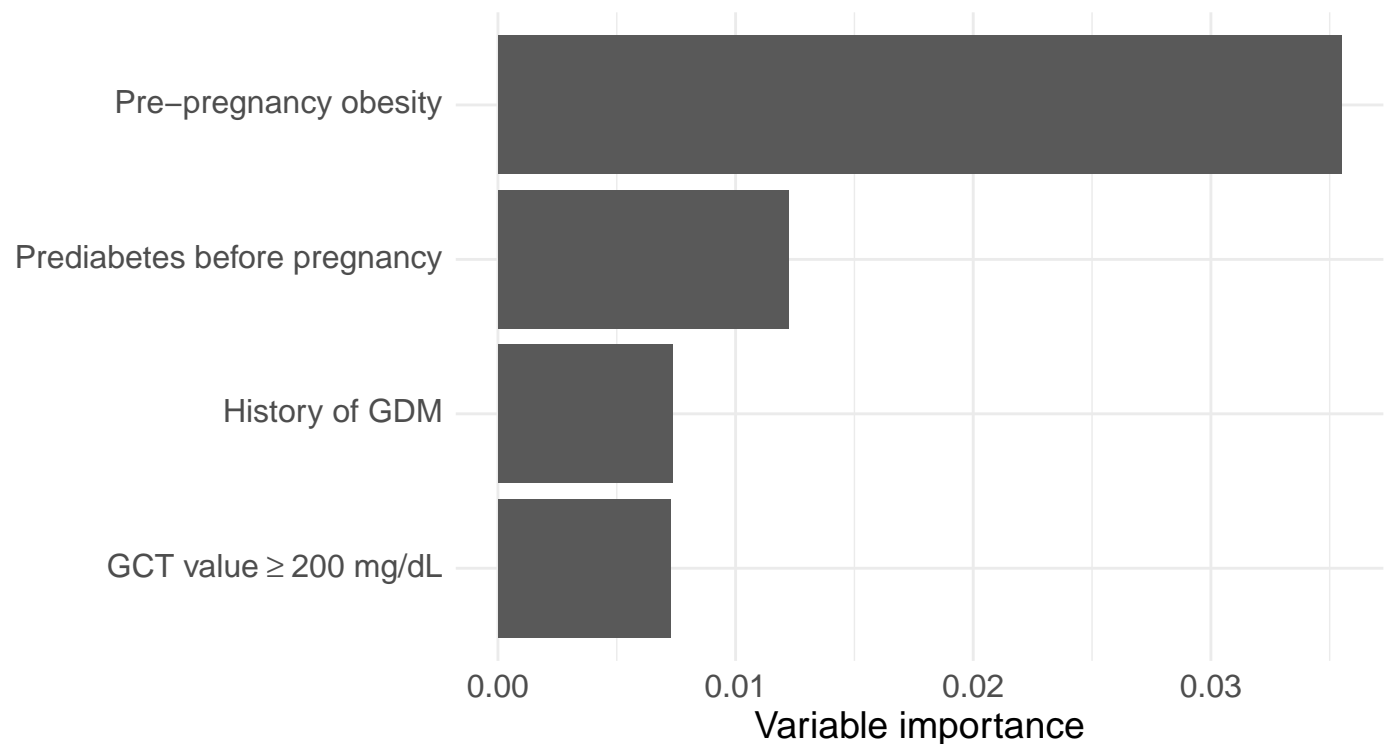**Simple super learner**  
using predictors at levels 1–2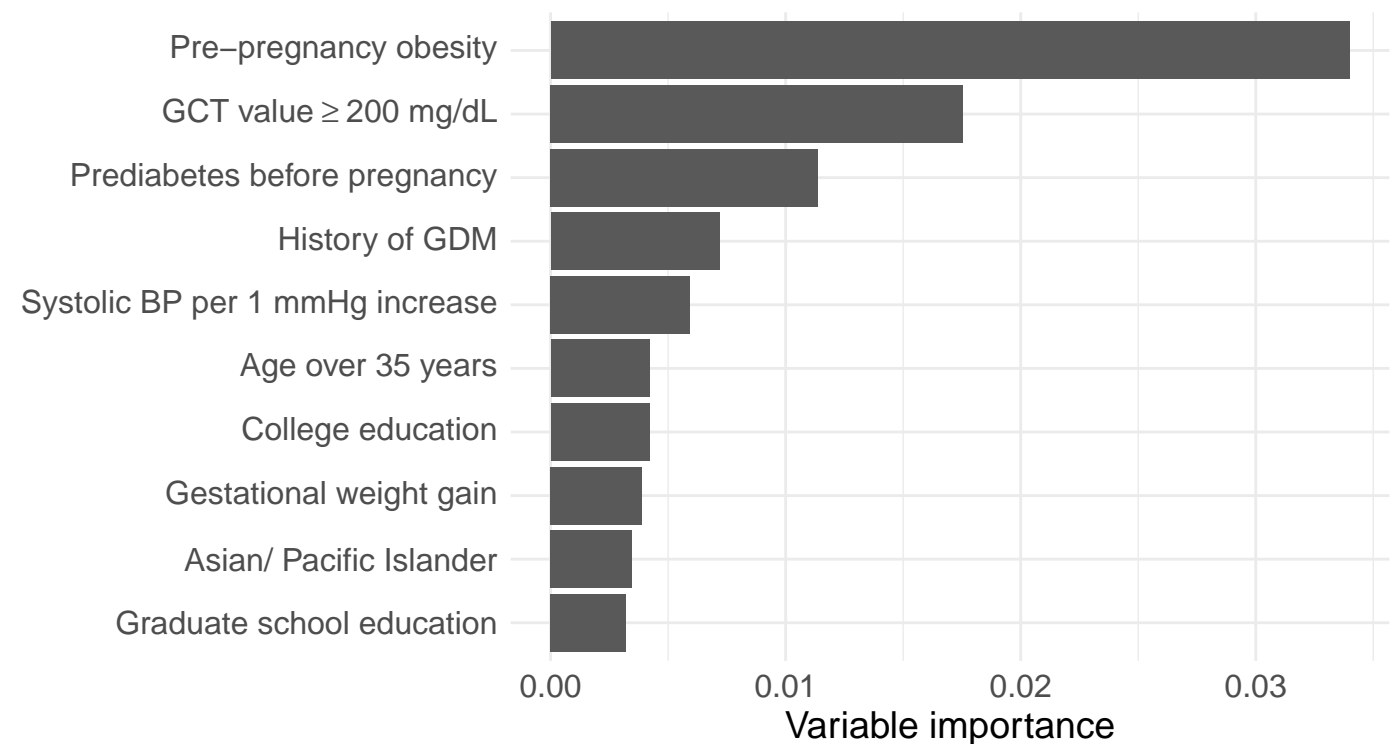

**C**

**CART**  
using predictors at levels 1–3

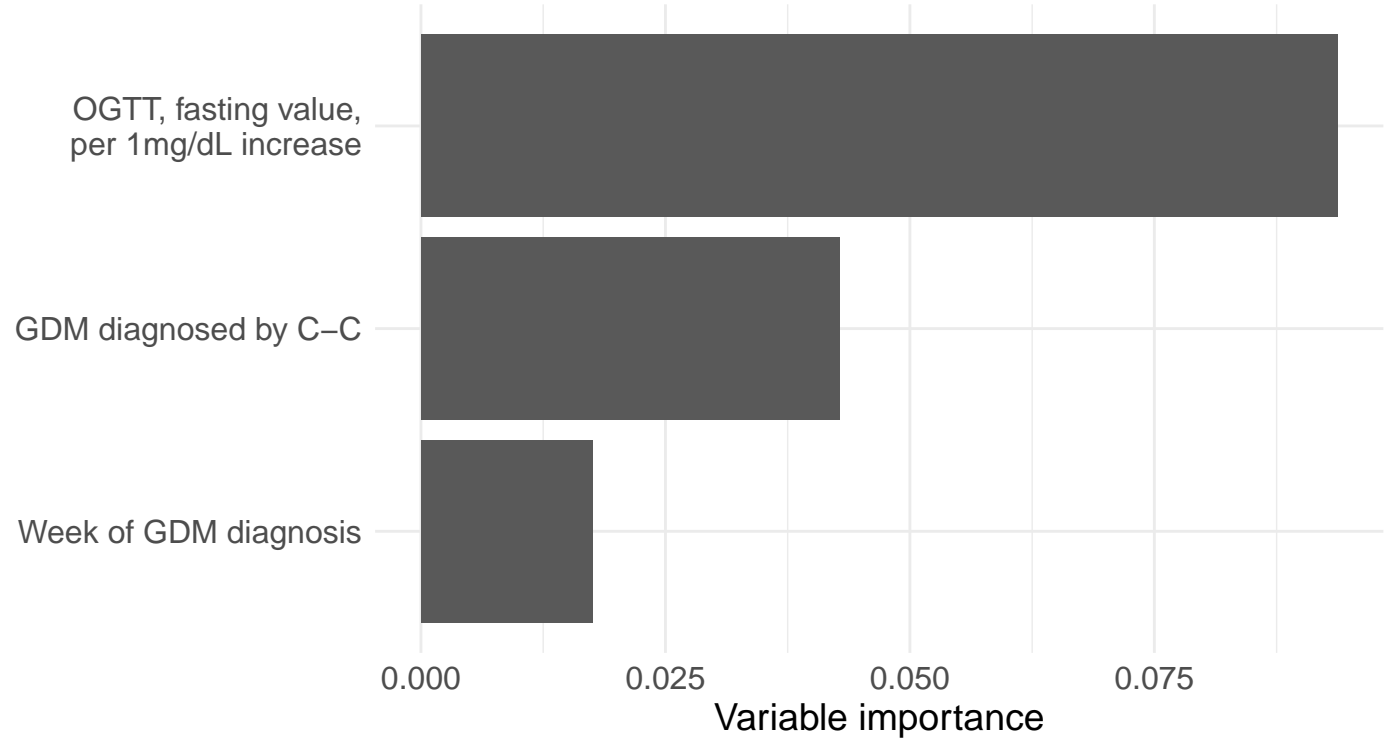

**Simple super learner**  
using predictors at levels 1–3

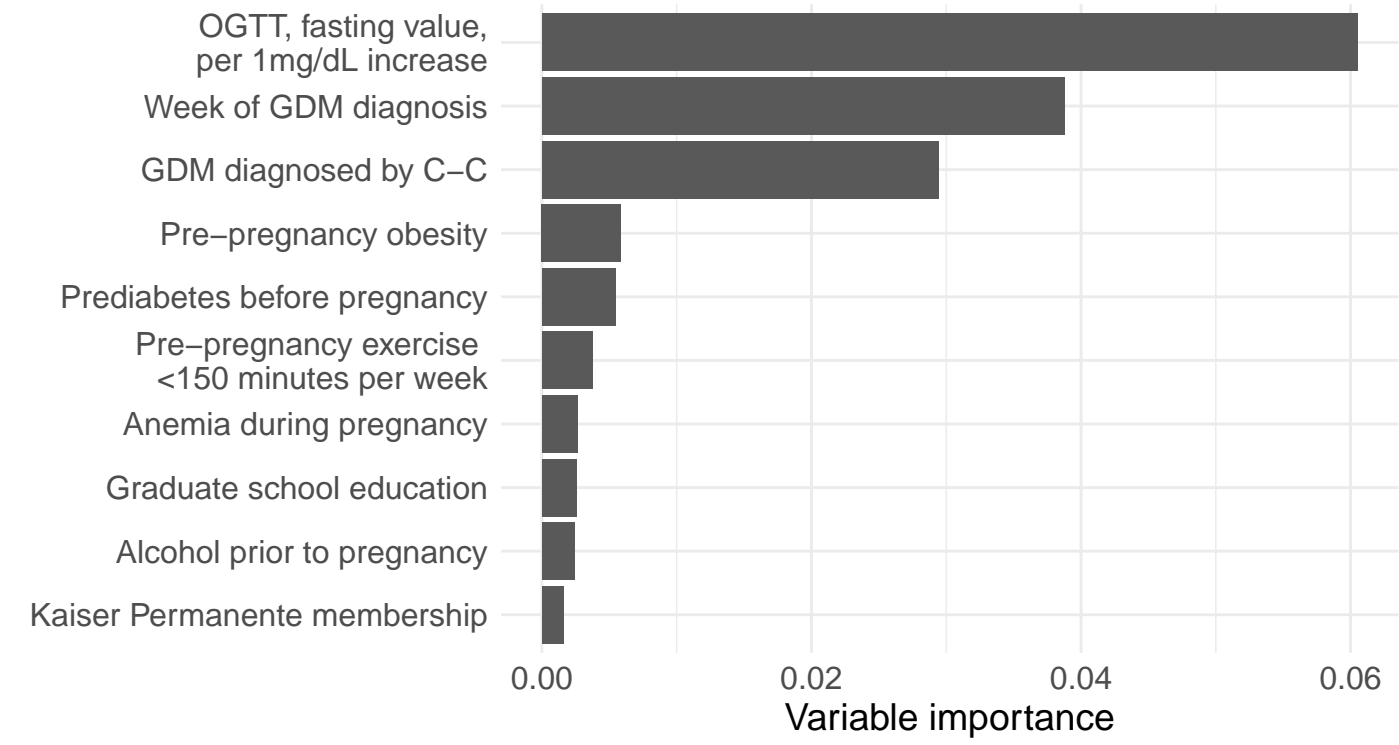**D**

**CART**  
using predictors at levels 1–4

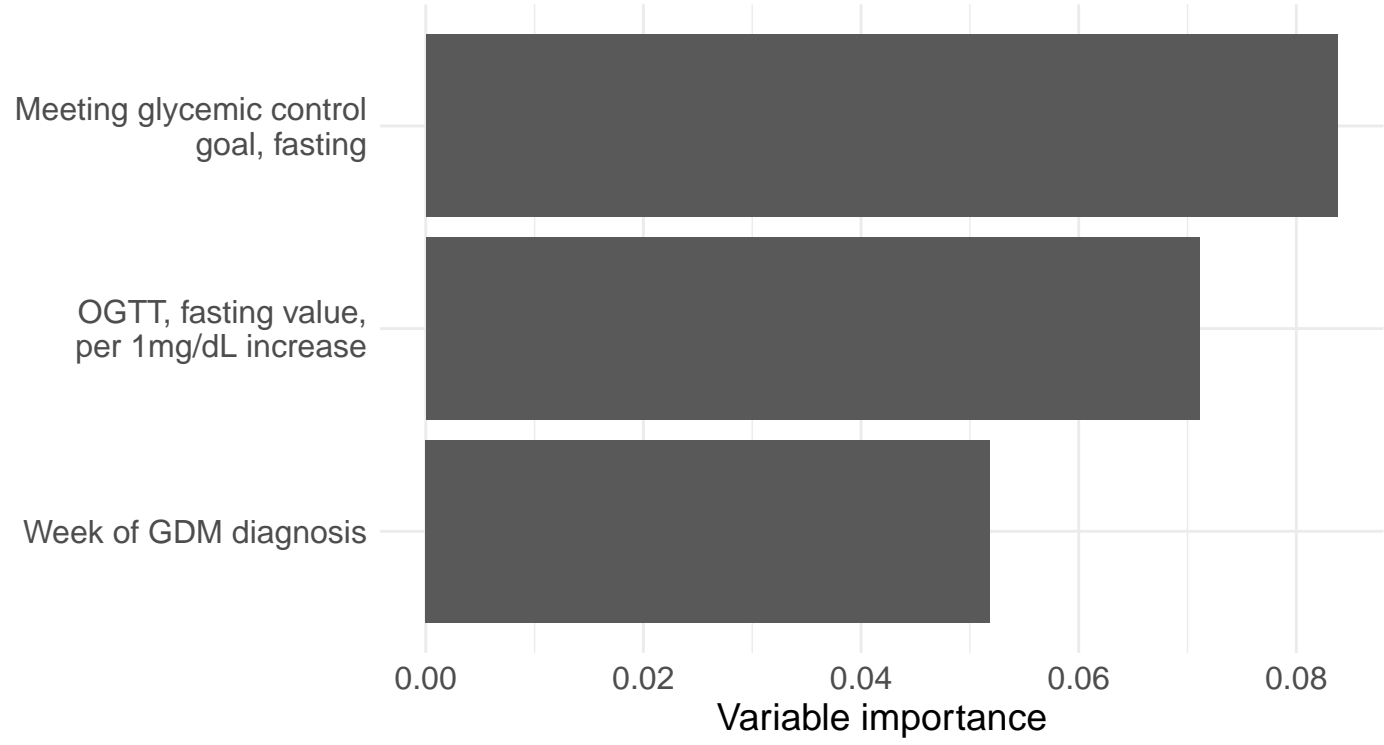

**Simple super learner**  
using predictors at levels 1–4

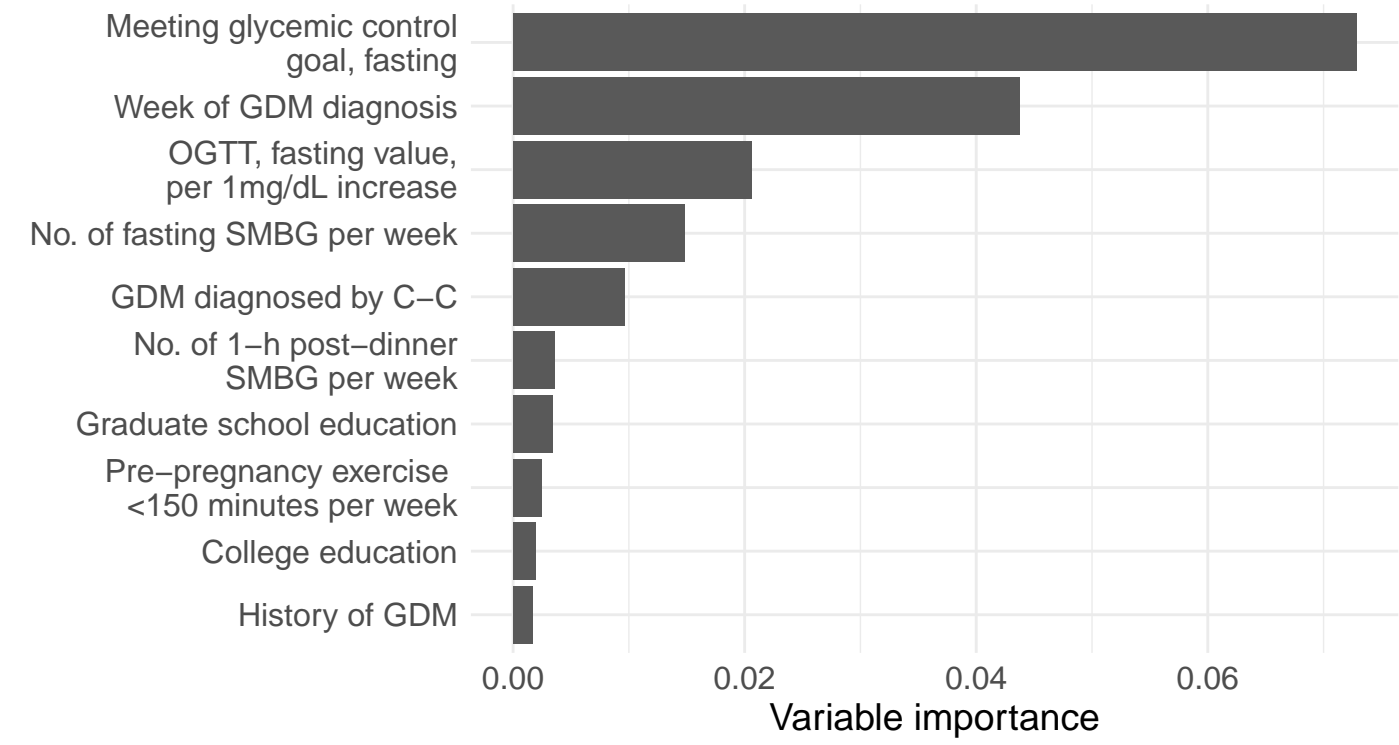

Supplement: MOESM8 [file 23497772]
