# Supplementary material for: Development and validation of prediction models for gestational diabetes treatment modality using supervised machine learning: a population-based cohort study
Source: Springer Nature journal article supplement (doi:10.1186/s12916-022-02499-7), 2022-09-15
Supplement: MOESM9 [file 23497772]

**Additional Table 7: Interaction term(s) selection for the simplified logistic regression models built upon the most influential predictors from levels 1-4 selected from the complex super learner**

|                    | Number of main terms and interaction terms included | 10-fold CV-AUC in the validation set |
|--------------------|-----------------------------------------------------|--------------------------------------|
| Full discovery set | 14                                                  | 0.800 (0.785-0.815)                  |
| Model 1            | 12                                                  | 0.800 (0.785-0.815)                  |
| Model 2            | 9                                                   | 0.800 (0.785-0.815)                  |
| Model 3            | 9                                                   | 0.801 (0.786-0.816)                  |
| Model 4            | 8                                                   | 0.798 (0.783-0.813)                  |
| Model 5            | 14                                                  | 0.799 (0.783-0.814)                  |
| Model 6            | 11                                                  | 0.795 (0.780-0.811)                  |
| Model 7            | 11                                                  | 0.803 (0.788-0.818)                  |
| Model 8            | 11                                                  | 0.800 (0.785-0.816)                  |
| Model 9            | 16                                                  | 0.798 (0.783-0.813)                  |
| Model 10           | 6                                                   | 0.794 (0.779-0.810)                  |

CV-AUC, cross validated area under the receiver operating characteristic curve.

The models 1-10 each represents stepwise regression fit on a tenth of the discovery set (non-overlapping).
